# Supplementary material for: Identification of a nine ferroptosis-related lncRNA prognostic signature for lung adenocarcinoma
Source: Research Square preprint supplement (doi:10.21203/rs.3.rs-210507/v2), 2021-03-02
Supplement: Supplementary file 1 [file 38ae9409e9ac26de2942f97a.xlsx]

## Sheet: Sheet1
Table1 Summary of clinical information for patients with LAUD
Variables	Case	Percentage
Gender
Male	242	0.463602
Female	280	0.536398
Age (years)
Range	33-88
Median	66
Race
ASIAN	8	0.0153257
BLACK	53	0.101533
AMERICAN INDIAN	1	0.00191571
WHITE	393	0.752874
unknow	67	0.128352
clinical Stage
Stage I	279	0.534483
Stage II	124	0.237548
Stage III	85	0.162835
Stage IV	26	0.0498084
unknow	8	0.0153257
T stage
T1+Tis	172	0.329502
T2	281	0.538314
T3	47	0.0900383
T4	19	0.0363985
Tx	3	0.00574713
Lymph node status
N0	335	0.641762
N1	98	0.187739
N2	75	0.143678
N3	2	0.00383142
Nx+unknow	12	0.0229885
Metastatic
M0	353	0.676245
M1	25	0.0478927
Mx+unknow	144	0.275862
Eml4-Alk translocation status
Yes	34	0.0651341
No	213	0.408046
unknow	275	0.52682
EGFR mutation status
Yes	80	0.153257
NO	197	0.377395
unknow	285	0.545977
KRAS mutation status
Yes	62	0.118774
No	253	0.484674
unknow	207	0.396552
Postoperative tumor status
WITH TUMOR	111	0.212644
TUMOR FREE	314	0.601533
unknow	97	0.185824
ECOG
0	95	0.181992
44199	124	0.237548
unknow	303	0.58046
History neoadjuvant treatment
Yes	3	0.00574713
No	518	0.992337
unknow	1	0.00191571
