# Supplementary material for: Identification of a nine ferroptosis-related lncRNA prognostic signature for lung adenocarcinoma
Source: Research Square preprint supplement (doi:10.21203/rs.3.rs-210507/v2), 2021-03-02
Supplement: Supplementary file 4 [file 950c7ac743944846b00b5327.xlsx]

## Sheet: Sheet1
Table 2 univariate and multivariate Cox regression of clinical features
clinical features	univariate Cox regression					multivariate Cox regression
	HR	HR.95L	HR.95H	pvalue		HR	HR.95L	HR.95H	pvalue
Age(continuous variable)	0.996534	0.977961	1.01546	0.71761		1.00407	0.985134	1.02336	0.67614
Gender	0.999988	0.69384	1.44122	0.99995		1.15929	0.795567	1.6893	0.441637
Clinical stage	1.64809	1.39591	1.94584	3.71567e-09		2.00482	1.26042	3.18885	0.00330989
T stage	1.60039	1.28462	1.99377	2.74594e-05		1.15939	0.913445	1.47156	0.224075
Distant metastasis	1.74845	0.959372	3.18656	0.0680731		0.382655	0.117338	1.2479	0.111211
Lymph-node status	1.78733	1.45529	2.19513	3.05495e-08		1.00682	0.678998	1.49292	0.97302
An nine autophagy-related lncRNAs signature	1.00347	1.00086	1.00609	0.00919727		1.00447	1.00174	1.00721	0.00133104
