# Supplementary material for: Identification of a nine ferroptosis-related lncRNA prognostic signature for lung adenocarcinoma
Source: Research Square preprint supplement (doi:10.21203/rs.3.rs-210507/v2), 2021-03-02
Supplement: Supplementary file 5 [file c3dc42e7d77d41f259a35ebc.xlsx]

## Sheet: Sheet1
Table 3 GSEA analysis enriched in the high-risk group and low-risk group of the ferroptosis-related lncRNAs prognostic signature.
MSigDB collection	Gene set name	NES	NOM p-val	FDR q-val
c2.cp.kegg.v7.2.symbols.gmt	KEGG_CELL_CYCLE	2.24649	0	0.00457153
	KEGG_UBIQUITIN_MEDIATED_PROTEOLYSIS	2.06764	0	0.0114415
	KEGG_P53_SIGNALING_PATHWAY	2.02954	0	0.014119
	KEGG_SMALL_CELL_LUNG_CANCER	1.74834	0.00409836	0.0788507
	KEGG_MISMATCH_REPAIR	1.92677	0.00610998	0.019158
	KEGG_ALPHA_LINOLENIC_ACID_METABOLISM	-1.87588	0	0.0913175
	KEGG_ARACHIDONIC_ACID_METABOLISM	-1.88994	0.00197628	0.116593
	KEGG_FATTY_ACID_METABOLISM	-1.93718	0.00397614	0.140444
NES: normalized enrichment score; NOM: nominal; FDR: false discovery rate. Gene sets with NOM P-value <0.05 and FDR q-value <0.25 were considered as significantly enriched.
